# Supplementary material
Source: publisher site journal article supplement (https://www.dovepress.com/article/324762)
Supplement: Supplementary file 1 [file get_supplementary_file.php]

**Annex-I**

**Operational Definitions and Measurements**

##### *Positive deviants* are mothers who practiced EBF for the first 6 months who were selected using specific criteria and used as agents for the intervention. Those mothers who had previous experience of EBF (if multi-para, for the last child) regardless of any challenges faced and have good knowledge, positive attitudes toward EBF, and good skills of BF practice, and attended all the training given by HEPs, and implemented all health extension packages and recognized as an opinion leader of her village, and used all recommended ANC services per visit, made institutional delivery and used PNC services for the last child.

- *Exclusive BF* refers to feeding infants less than six months of age only breast milk, no added foods or liquids, except for medicines, syrups, or vitamins. The exclusive BF rate was calculated as the number of infants less than six months of age who were exclusively BF divided by the total number of infants under six months in the group multiplied by 100%.
- *Timely initiation of BF* refers to BF within an hour of birth. It was calculated as the number of newborns who were BF within an hour of birth divided by the number of newborns in the group multiplied by 100%.
- *Predominant BF* means that breastmilk is the predominant source of nourishment but the infant also receives water, water-based drinks, fruit juice,or oral rehydration solutions. It was calculated as the number of infants less than six months of age who were predominantly BF divided by the number of infants under six months of age in the group multiplied by 100%.
- *Complementary feeding* is the process of giving an infant food in addition to breast milk when breast milk becomes insufficient to satisfy the infant's nutritional requirements. It was calculated as the number of infants six months and older who started complementary feeding divided by the number of infants six months and older in the group multiplied by 100%.
- *Pre-lacteal feeding* was defined as feeding an infant something other than breast milk in the first three days of life. It was calculated as the number of infants less than 6 months of age who received something other than breast milk in the first three days of life divided by the number of infants under six months in the group multiplied by 100%.
- *Partial BF or mixed feeding*: the infant is given some breast feeds and some artificial feeds, either milk or cereal, or other food or water.
- *Bottle-feeding*: the infant is feeding from a bottle, regardless of its contents, including expressed breast milk.
- *Never BF Rate* is the proportion of infants who never even begin to BF during the study period.
- *Expressed breast milk* was defined as breast milk that was squeezed out and stored so that the infant could be fed at a later time. It is an optional practice to maintain EBF when the mother gets busy due to work.
- *Mean duration of lactational amenorrhea* referred to the average number of months without menstrual bleeding for a mother who BF exclusively.
- *Mean duration of BF* was measured as the average minutes that a baby BF without interruption.
- *Frequency of BF* referred to the number of times that an infant was BF per day. It is considered as less frequent if < 8 times or frequent if 8-12 times per day because the young infant’s stomach capacity is limited, and frequent suckling is necessary to meet the child’s nutritional needs.
- *Knowledge of EBF* was measured using 17 items that assessed knowledge of BF with Yes=1 (correct) or No=0 (incorrect) response. Mothers who scored greater than or equal to the mean score were considered to have “good knowledge” and those who scored below the mean score were considered to have “poor knowledge.”
- *Attitude toward exclusive BF* was measured using 12 items with five-point Likert scale agreement responses (1-strongly disagree to 5-strongly agree), and the mean value was used to categorize the respondents as having a“favorable” attitude or “unfavorable” attitude toward EBF.
- *Self-efficacy w*as measured using 11 items with five-point Likert scale agreement responses (1-strongly disagree to 5-strongly agree), and the mean value was used to categorize the respondents as having “good self-efficacy” or “poor self-efficacy”.

**Annex-II**

**Six steps of designing the PDA**

1. Defining the problem: we worked together with HEPs, model mothers and invited volunteer women from the community in defining the problem or why mothers do not exclusively breast feed in context.
2. The project team communicated HEPs to call HDA leaders, model mothers and invited volunteer women purposively to discuss real problems with EBF.
3. The main agenda for the discussion was “What are the problems of newborn/infant caring practice in the community and why?”. With focus on EBF.
4. The principal investigator was the facillitator of this qualitative investigation so that to ensure whether it is part of the pre-planned intervention or not. Mothers had the following worries in relation to EBF practices;

- Feeling tense and overwhelmed while they think EBF
- Difficulty of combining work and BF
- Feeling very tired while they think the recommended duration of EBF and the needed effort.
- Difficulty in positioning the baby
- Worry of not having enough milk and the baby may not get satisfied
- Worry about the baby weight gain
- Fear of sleeping disorder to feed breast during night
- Baby is in difficulty during sucking
- Worry about sore nipple and breast infection
- Worry about breast engorgement, leakage of milk and associated loss of beauty
- Caring with BF difficulty for 6 months
- Weaning difficulty to switch BF-difficulty to wean to start supplementary feeding.

From the qualitative study, we understood that a mother who gave birth was affected by many factors not to practice EBF such as predisposing, enabling, and re-enforcing factors. These factors are salient aspects of mothers’ psychological context. Predisposing factors were her knowledge of EBF, attitude toward exclusiveness, self-efficacy, and skill of breast feeding. Some examples of enabling factors were feeling helpless if no experienced mothers around, and if available become enablers. Re-enforcing factors could be positive or negatives ones. Examples of negative reinforcing factors were worrying about her baby body size and health; if become thin and thin, mothers think about formula feeding to be fat like others baby. Positive re-enforcing factors such as if her baby becomes fat and healthy with the only BF encouraged to continue which may re-enforce her. Mothers may also refer to other nearby mothers’ practices regarding breast feeding. If mothers in her network are not breast feed or practice mixed feeding and if their baby looks healthy, she may think of what is going on such babies, and then she may try to give additional foods similar to what others did. On the other way, other intimate peers may push to give some additional so that to have strong enough and fattened baby. If the mother not accept this, during coffee ceremony or in any other event simply family members or relatives gave water or sweetened fluids without the mother’s permission. This all affects mothers’ psychology that may needs informational counseling and sharing lived experiences with emotional and appraisal components of social support including her relevant others in the family.

1. Determining the presence of PD individuals: Once we defined the real existing problem regarding practice of EBF. Health extension professionals helped the project team identify positive deviants in the community.
2. We tried to search whether some positive deviants exist and had lived experience to overcome the identified community problem during the group discussion together with the volunteer women and health extension professionals. After confirming their presence, we developed a list of criteria to select PDs from the community by shortlisting, completing checklist/criteria, and interviewing from the final lists.
3. The process of the positive deviance approach was started by training HEPs and HDA leaders on the overall objective of the intervention and identifying deviant cases from the community. Then we assessed each of the candidates using the following objective and subjective set of criteria. Thirteen (13) PDs were selected out of 39 final short-listed who came directly from the community and screened using the following criteria;
4. Previous experience of EBF with best practices (if multi-para, for the last child) regardless of any challenges and,
5. Have good knowledge, positive attitude toward EBF, and good skills of BF-verified through interview and demonstration (using rating scale) and,
6. Willingness/motivation to take part in the intervention with good communication skill demonstrated during interview and
7. Attended all the training given by HEPs and implemented all health extension packages and recognized as an opinion leader of her village and
8. Uptake of all recommended ANC visits, institutional delivery, and PNC services for her last pregnancy/delivery.
9. Discovering uncommon practices or behaviors:
10. At this step, the team tried to discover best practices that are uncommon, scientifically sound (initiation, frequency, position, attachments, and time of starting EBF as per the WHO protocol), and positive attitudes to overcome identified major problems.
11. At the second step, we identified individuals that have a positive attitude toward EBF and had lived experience to solve EBF problems using listed criteria.
12. The team members set out behaviors and attitudes that allow the positive deviants to be successful in caring for their baby to feed breast milk exclusively. Scientifically sound and socially acceptable practices were investigated by the project team, HEPs, and HDA leaders. Those discovered best practices were included in the intervention package to be used by PDs.
13. Discover uncommon practices or behaviors: the project team, in discussion with positive deviants, determined the behaviors that allowed them to successfully breast feed alone for the first six months.

In this step, qualitative research methods were used to identify the successful behaviors and practices, using (i) mini-unfocused group discussions among WHDA leaders; (ii) key informant interviews with HEPs and in-depth interviews with mothers from the community (iii) observational visits to homes of 5 lactating mothers; and (v) observational visits to health posts. The study focused on identifying the intentional and unintentional behaviors and practices of mothers and the strategies that enable them to achieve better EBF practice for their children. PD mothers practiced exclusive BF for six months irrespective of their working status and avoided giving any other thing except supplements and medicines. For example, if working mothers reported as she expressed breast milk and kept the containers at home when working far away, could be uncommon practice. Some working mothers may also come home and BF their infants or take them to the daycare center to look after them intermittently.

Hence, a mother who overcomes identified challenges to feed breast milk exclusively was considered as had uncommon practice. The causes/challenges identified were peer pressure to mix food, intention toward industrial products, work after maternity leave, knowledge gap, unfavorable attitude, skill gap, a cosmetic issue, and limited support from partner/relevant others. Those mothers might practice EBF with own solution, seeking advice from professionals, or by receiving support from husband or relevant others.

Medically, PD mothers may comply with the recommended visits to the health institutions and also independently contact health care providers whenever they need advice. Thus, they seem to have a close relationship with the health care providers and are more receptive to inputs from health professionals, in comparison to the others. Furthermore, these mothers proactively seek information, from multiple sources, related to feeding and child care and put the information to use. The caring practices among the PD families may be based on the decisions of the mother or mother jointly with the father/other family members, irrespective of the mother’s employment status. The PD’s husband/partner was also actively involved in the actual child care responsibilities, especially help in positioning, breast attachment, and providing expressed breast milk while she was away. Therefore, we asked them how they overcome the challenges of EBF practice at urban setting concerning the above medical and social issues, and their explanation and our observation result shows deviation. There were two main questions we asked; (1) Are there mothers who practice EBF regardless of any challenges faced in the community? Yes, of course, some mothers were managed to feed exclusively without access to any special resources despite they face many challenges-this helped to identify candidates for positive deviation, (2) what were these PD mothers doing that others were not and how? The answers for this question were used to supplement the first selection criteria during the interview.

1. Program design:
2. After we identified successful practices, the community health workers including HEPs and PDs decided what strategies they would like to follow.
3. And design activities to help others access and practice these uncommon and other beneficial behaviors. Our intervention was designed to supplement the counseling and social support process.
4. Community members selected strategies to adopt among those practiced by positive deviants. These strategies were added to those already chosen by the project team strategies to adopt for the intervention.
5. Monitoring and evaluation
6. The project was monitored by community health workers and the project team. Also, its process was evaluated through a review meeting. Activities were monitored that used to see whether implemented as planned or not to take corrective action a soon as possible.
7. In line with this, to evaluate the progress of the intervention, data were collected three times at the beginning, midline, and final stage.
8. Scaling up
9. If it was found to be effective, scale up was considered as part of sustainability plan, after the intervention.
10. We expect that the community observing the success and engaging in a PD project, might adopt the practice that remains vital to the acceptance of new behaviors.
11. After the completion of the project, the changes and improvements resulted from this project were evaluated and the improvements achieved could be taken examplery to recommend scale up in the other remaining kebeles, zonal, regional and national level by selecting similar settings.

### Since the whole process conducted with the community, strengths, weakness, opportunities and challenges identified that would help to re-plan the future scale up program. During piloting and scale-up of this intervention, the primary beneficiaries were newborn/infants, mothers & future generation as a whole to be healthy and productive.

**Annex-III**

**Co-created Messages with PDs (Basic Concept and Benefit of EBF)**

1. **Concept of EBF and its benefit**

- Exclusive BF practice means that an infant should receive only breast milk from his/ her mother or a wet nurse, or expressed breast milk and no other liquids, or solids, except drops or syrups consisting of vitamins, minerals supplements, or medicines for the first six months.
- Breast milk provides all infants nutritional and fluid needs in the first six months and is a perfect combination of proteins, fats, carbohydrates, and fluids and it is the best and cost-effective intervention to reduce infant morbidities and mortalities.
- Therefore, exclusively BF for the first six months and continuation of BF up to 24 months or beyond with complementary feeding have paramount importance on your baby’s health and growth.
- If you didn’t use this cost-effective intervention you may scarify a lot when your infant ends with illness and malnutrition.
- Your infant will get white blood cells through your breast milk which can make the baby’s immune strong rather than never get it from any other formula or cow milk feeding.
- To practice EBF, you have to initiate BF within one hour of life or immediately after birth.
- This has two important things: your baby will get colostrum-Amharic (Inger) that has very good nutritional values.

1. **Milk production mechanism and feeding techniques**

- On the other hand, your baby will learn sucking and your breast will be stimulated more to produce more milk to the next sucking.
- Put the baby to the breast frequently (8-12 or more/day) and take yourself more fluids and sips because the milk production depends upon how much the baby sucks/stimulates it and how much you take food/fluid.
- When you put the baby to your breast make sure that you hold it in the correct position and attachment (supported by PDs).
- Hold your breast gently with your hand around the middle without pressing with your fingers to facilitate more flow of milk toward the nipple.
- Make sure that the baby’s mouth is well sucked the breast nipple and the lips should be bulged out.
- If your baby is low birth weight and indicated by the birth attendant to put on Kangaor mother care, try to give your breast while the baby is in between the two breasts because that initiates the newborn to suck strongly.

1. **Practical support, milk expression technique and assurance**

- After sharing the lived best experiences of PDs and explaining their experiences to the project team, they were oriented to transmits/transfer their skill with positive side [demonstrations were conducted during training].
- Psychosocial support and verification of mothers’ understanding of EBF practice were also managed by positive deviants as per the protocol.
- When the mother became busy or go to work rather than giving any other sorts of foods, expressing breast milk using POP-expresser or manual expressing techniques then putting with cup till the mother gets back (it can be stored for about 6 hrs), was recommended.
- If the milk expressed was not too much try to come back as soon as possible or try to compensate the feeding while you are with your baby.
- If you do all the recommended things and feed breast milk only for the first 6 months, your baby will be healthy and the body can defend against diseases easily.

1. **Negative subjective norms and Maternal benefits**

- You may hear information as practicing EBF till 6 months will affect the infant’s appetite to switch breast milk at the weaning period to start new complementary food easily.
- This depends on the technique that the mothers apply to transit their baby to complementary feeding.
- If the baby gets frequent, small, variety of foods in different style and at different mood, sure he/she will adapt.
- Rather than following others’ what told to you, always it is best to check by yourself and you will be one of the mothers who can talk about this recommended practice and how did you tackle it for the sake of your baby’s ultimate health. By the way, when you practice EBF, you are also on the safe side.
- You may not suffer a lot from breast engorgement and associated pain; you are at low risk of breast cancer, and unwanted pregnancy.
- Therefore, you will be healthy and your baby will be healthy so you will lead a healthy family life that is the meaning of quality of life.

1. **Re-assurance on BF technique, benefit and impact**

- Once again, please don’t forget to take enough amounts of fluid and food for you that determine the milk production.
- Don’t press your breast with your two fingers during feeding that will hinder the flow of milk toward the nipple.
- Then accumulated milk may engorge your breast and you may suffer due to pain, even it may become one of the risk factors for cancer.
- If the whole nipple part is not immersed into the infant’s mouth until it bulged out, the intensity of sucking will be affected and duration becomes short so that your baby didn’t get adequate nutrient.
- This leads to malnourished conditions and normal growth will be affected in the short and long-term.
- If KMC was indicated for low birth weight, don’t forget to give your breast while the baby is in between of your two breasts because that initiates the newborn to suck strongly.
- In addition, it would be nice if you know the danger signs of newborn such as poor feeding, deadly fever, diarrhea/vomiting, and often a combination of these may occur due to interruption of BF with other foods/fluids.
- As some of the mothers might tell you, when you become busy, expressing breast milk not affect nipple sharpness and milk production because I have tried it.
- If you don’t do all the recommended things and do not feed breast milk only for the first 6 months, your baby will be unhealthy and may contract diseases easily.
- In terms of cost, you will expend much more to treat yourself as well as your baby but all are preventable via practicing only breast feeding.
